# Supplementary material
Source: PubMed Central journal article supplement (PMC6218821)

Supplemental Table 1. Definition of Clinical Covariates

| Clinical Covariate | Definition                                                                                                                                                                                                                                                                                                                                                                                                                                                                                                                                                                                                                                                                                                                                                                                                                                                                                                                                                                                                                                                                                                                                                                                                                                                                                                                                                                                                                                                                                                                                                                                                                                                               |                                                   |            |
|--------------------|--------------------------------------------------------------------------------------------------------------------------------------------------------------------------------------------------------------------------------------------------------------------------------------------------------------------------------------------------------------------------------------------------------------------------------------------------------------------------------------------------------------------------------------------------------------------------------------------------------------------------------------------------------------------------------------------------------------------------------------------------------------------------------------------------------------------------------------------------------------------------------------------------------------------------------------------------------------------------------------------------------------------------------------------------------------------------------------------------------------------------------------------------------------------------------------------------------------------------------------------------------------------------------------------------------------------------------------------------------------------------------------------------------------------------------------------------------------------------------------------------------------------------------------------------------------------------------------------------------------------------------------------------------------------------|---------------------------------------------------|------------|
| <b>Diabetes</b>    | <p>History of Type 1 and Type 2 diabetes mellitus observed at any point during the baseline period: Identified using criteria specified from the Kaiser Permanente Southern California (KPSC) Diabetes Registry through pharmacy information and inpatient or outpatient diagnoses and defined as any of the following:</p> <ul style="list-style-type: none"> <li>a) At least one primary inpatient discharge diagnoses of ICD-9 250.x (claims plan and outpatient codes from emergency department (ED) Obstetrics/Gynecology Podiatry and Ophthalmology are excluded); <b>OR</b></li> <li>b) At least two or more outpatient diagnoses of ICD-9 250.x (claims plan and outpatient codes from ED Obstetrics/Gynecology Podiatry and Ophthalmology are excluded) occurring on separate dates no more than 2 years apart; <b>OR</b></li> <li>c) At least one or more dispensed prescriptions for an oral hypoglycemic agent (see medication list below excluding use of metformin [GPI ‘2725’] exenatide [GPI ‘2717002’] liraglutide [GPI ‘2717005’] thiazolidinedione [GPI ‘2760’] or repaglinide [GPI ‘2728’] only) <b>OR</b> insulin (GPI ‘2710’)</li> <li>d) Women diagnosed with gestational diabetes (ICD-9 codes 648.8x, 790.21, 790.22, 790.29) within 8 months from the inpatient or outpatient diagnosis of diabetes mellitus will be excluded from meeting the definition of diabetes.</li> <li>e) Patients receiving metformin, exenatide, thiazolidinedione, or repaglinide exclusively (with no other agent) or with no inpatient or outpatient diagnosis of diabetes within two years will be excluded from meeting the definition of diabetes.</li> </ul> |                                                   |            |
|                    | <b><u>Oral Hypoglycemic Medications</u></b>                                                                                                                                                                                                                                                                                                                                                                                                                                                                                                                                                                                                                                                                                                                                                                                                                                                                                                                                                                                                                                                                                                                                                                                                                                                                                                                                                                                                                                                                                                                                                                                                                              |                                                   |            |
|                    | <i>Generic name</i>                                                                                                                                                                                                                                                                                                                                                                                                                                                                                                                                                                                                                                                                                                                                                                                                                                                                                                                                                                                                                                                                                                                                                                                                                                                                                                                                                                                                                                                                                                                                                                                                                                                      | <i>Class</i>                                      | <i>GPI</i> |
|                    | Acarbose                                                                                                                                                                                                                                                                                                                                                                                                                                                                                                                                                                                                                                                                                                                                                                                                                                                                                                                                                                                                                                                                                                                                                                                                                                                                                                                                                                                                                                                                                                                                                                                                                                                                 | Alpha-glucosidase inhibitor                       | ‘2750’     |
|                    | Acetohexamide                                                                                                                                                                                                                                                                                                                                                                                                                                                                                                                                                                                                                                                                                                                                                                                                                                                                                                                                                                                                                                                                                                                                                                                                                                                                                                                                                                                                                                                                                                                                                                                                                                                            | Sulfonylurea                                      | ‘2720’     |
|                    | Canagliflozin                                                                                                                                                                                                                                                                                                                                                                                                                                                                                                                                                                                                                                                                                                                                                                                                                                                                                                                                                                                                                                                                                                                                                                                                                                                                                                                                                                                                                                                                                                                                                                                                                                                            | Sodium-glucose co-transporter 2 (SGLT2) inhibitor | ‘2770’     |
|                    | Chlorpropamide                                                                                                                                                                                                                                                                                                                                                                                                                                                                                                                                                                                                                                                                                                                                                                                                                                                                                                                                                                                                                                                                                                                                                                                                                                                                                                                                                                                                                                                                                                                                                                                                                                                           | Sulfonylurea                                      | ‘2720’     |
|                    | Exenatide* (injection drug but count as oral)                                                                                                                                                                                                                                                                                                                                                                                                                                                                                                                                                                                                                                                                                                                                                                                                                                                                                                                                                                                                                                                                                                                                                                                                                                                                                                                                                                                                                                                                                                                                                                                                                            | Glucagon-like peptide-1 (GLP-1) agonist           | ‘2717’     |
|                    | Glimepiride                                                                                                                                                                                                                                                                                                                                                                                                                                                                                                                                                                                                                                                                                                                                                                                                                                                                                                                                                                                                                                                                                                                                                                                                                                                                                                                                                                                                                                                                                                                                                                                                                                                              | Sulfonylurea                                      | ‘2720’     |
|                    | Glipizide                                                                                                                                                                                                                                                                                                                                                                                                                                                                                                                                                                                                                                                                                                                                                                                                                                                                                                                                                                                                                                                                                                                                                                                                                                                                                                                                                                                                                                                                                                                                                                                                                                                                | Sulfonylurea                                      | ‘2720’     |
|                    | Glipizide-metformin HCl                                                                                                                                                                                                                                                                                                                                                                                                                                                                                                                                                                                                                                                                                                                                                                                                                                                                                                                                                                                                                                                                                                                                                                                                                                                                                                                                                                                                                                                                                                                                                                                                                                                  | SU-Metformin combo                                | ‘2799’     |
|                    | Glyburide                                                                                                                                                                                                                                                                                                                                                                                                                                                                                                                                                                                                                                                                                                                                                                                                                                                                                                                                                                                                                                                                                                                                                                                                                                                                                                                                                                                                                                                                                                                                                                                                                                                                | Sulfonylurea                                      | ‘2720’     |

Supplemental material is neither peer-reviewed nor thoroughly edited by CJASN. The authors alone are responsible for the accuracy and presentation of the material.

|                                                                                                                                                                                                                                                                                                                                                                                                                                                                                                                                                                                                                                                                             |                                             |        |
|-----------------------------------------------------------------------------------------------------------------------------------------------------------------------------------------------------------------------------------------------------------------------------------------------------------------------------------------------------------------------------------------------------------------------------------------------------------------------------------------------------------------------------------------------------------------------------------------------------------------------------------------------------------------------------|---------------------------------------------|--------|
| Glyburide micronized                                                                                                                                                                                                                                                                                                                                                                                                                                                                                                                                                                                                                                                        | Sulfonylurea                                | '2720' |
| Glyburide-metformin                                                                                                                                                                                                                                                                                                                                                                                                                                                                                                                                                                                                                                                         | SU-Metformin combo                          | '2799' |
| Linagliptin                                                                                                                                                                                                                                                                                                                                                                                                                                                                                                                                                                                                                                                                 | Dipeptidyl peptidase IV (DPP-IV) inhibitors | '2755' |
| Linagliptin-metformin HCl                                                                                                                                                                                                                                                                                                                                                                                                                                                                                                                                                                                                                                                   | DPP-IV-Metformin combo                      | '2799' |
| Liraglutide*                                                                                                                                                                                                                                                                                                                                                                                                                                                                                                                                                                                                                                                                | GLP-1 agonist                               | '2717' |
| Metformin HCl*                                                                                                                                                                                                                                                                                                                                                                                                                                                                                                                                                                                                                                                              | Biguanide                                   | '2725' |
| Miglitol                                                                                                                                                                                                                                                                                                                                                                                                                                                                                                                                                                                                                                                                    | Alpha-glucosidase inhibitor                 | '2750' |
| Nateglinide                                                                                                                                                                                                                                                                                                                                                                                                                                                                                                                                                                                                                                                                 | Meglitinides                                | '2728' |
| Pioglitazone HCl*                                                                                                                                                                                                                                                                                                                                                                                                                                                                                                                                                                                                                                                           | Thiazolidinediones (TZDs)                   | '2760' |
| Pioglitazone HCl-glimepiride                                                                                                                                                                                                                                                                                                                                                                                                                                                                                                                                                                                                                                                | TZD-SU combo                                | '2799' |
| Pioglitazone HCl-metformin HCl                                                                                                                                                                                                                                                                                                                                                                                                                                                                                                                                                                                                                                              | TZD-Metformin combo                         | '2799' |
| Pramlintide acetate (injection drug but count as oral drug)                                                                                                                                                                                                                                                                                                                                                                                                                                                                                                                                                                                                                 | Pramlintide                                 | '2715' |
| Repaglinide*                                                                                                                                                                                                                                                                                                                                                                                                                                                                                                                                                                                                                                                                | Meglitinides                                | '2728' |
| Repaglinide-metformin HCl                                                                                                                                                                                                                                                                                                                                                                                                                                                                                                                                                                                                                                                   | Meglitinides-Metformin combo                | '2799' |
| Rosiglitazone maleate*                                                                                                                                                                                                                                                                                                                                                                                                                                                                                                                                                                                                                                                      | TZD                                         | '2760' |
| Rosiglitazone-glimepiride                                                                                                                                                                                                                                                                                                                                                                                                                                                                                                                                                                                                                                                   | TZD-SU combo                                | '2799' |
| Rosiglitazine-metformin                                                                                                                                                                                                                                                                                                                                                                                                                                                                                                                                                                                                                                                     | TZD-Metformin combo                         | '2799' |
| Saxagliptin HCl                                                                                                                                                                                                                                                                                                                                                                                                                                                                                                                                                                                                                                                             | DPP-IV inhibitors                           | '2755' |
| Saxagliptin-metformin                                                                                                                                                                                                                                                                                                                                                                                                                                                                                                                                                                                                                                                       | DPP-IV-Metformin combo                      | '2799' |
| Sitagliptin phosphate                                                                                                                                                                                                                                                                                                                                                                                                                                                                                                                                                                                                                                                       | DPP-IV inhibitors                           | '2755' |
| Sitagliptin-metformin HCl                                                                                                                                                                                                                                                                                                                                                                                                                                                                                                                                                                                                                                                   | DPP-IV-Metformin combo                      | '2799' |
| Tolazamide                                                                                                                                                                                                                                                                                                                                                                                                                                                                                                                                                                                                                                                                  | Sulfonylurea                                | '2720' |
| Tolbutamide                                                                                                                                                                                                                                                                                                                                                                                                                                                                                                                                                                                                                                                                 | Sulfonylurea                                | '2720' |
| Voglibose                                                                                                                                                                                                                                                                                                                                                                                                                                                                                                                                                                                                                                                                   | Alpha-glucosidase inhibitor                 | '2750' |
| <p>*Patients with dispensing records of these agents exclusively (with no other diabetes medication or with no diagnosis of diabetes) are not included.</p> <p>For example:</p> <p>Patients with one of the * drugs and an eligible diagnosis code would be included. Patients with one of the * drugs and another diabetes medication (another drug in the table or insulin) would be included.</p> <p>Patients with two of the * drugs but no eligible diagnosis codes would be included.</p> <p>Patients with one of the * drugs and no use of another diabetes medication (another drug in the table or insulin) and no eligible diagnosis codes would be excluded.</p> |                                             |        |

Supplemental material is neither peer-reviewed nor thoroughly edited by CJASN. The authors alone are responsible for the accuracy and presentation of the material.

|                                    |                                                                                                                                                                                                                                                                                                                                                                                                                                                                                                                                                                                                                                                                                                                                                                                                                                                                                                                                                                                                                                                                                                                                                                                                                                                                                                                                        |
|------------------------------------|----------------------------------------------------------------------------------------------------------------------------------------------------------------------------------------------------------------------------------------------------------------------------------------------------------------------------------------------------------------------------------------------------------------------------------------------------------------------------------------------------------------------------------------------------------------------------------------------------------------------------------------------------------------------------------------------------------------------------------------------------------------------------------------------------------------------------------------------------------------------------------------------------------------------------------------------------------------------------------------------------------------------------------------------------------------------------------------------------------------------------------------------------------------------------------------------------------------------------------------------------------------------------------------------------------------------------------------|
| <b>Hypertension</b>                | Defined as at least 2 outpatient ICD-9 codes of 401-405 OR at least one outpatient diagnosis of hypertension plus 1 or more anti-hypertensive drug prescriptions [GPI '33', '34', '36', '37'] within 1 year of outpatient diagnosis.                                                                                                                                                                                                                                                                                                                                                                                                                                                                                                                                                                                                                                                                                                                                                                                                                                                                                                                                                                                                                                                                                                   |
| <b>Acute Myocardial Infarction</b> | Defined as at least one inpatient discharge diagnosis of ICD-9 code 410.x (any position), and coronary revascularization defined as at least one inpatient or outpatient diagnoses for PCI (ICD-9 procedure codes 00.66, 36.01, 36.02, 36.05-36.07, 36.09; CPT codes 92980-92982, 92984, 92995, 92996) or CABG (ICD-9 procedure codes 36.10-36.19; CPT codes 33510-33519, 33521-33523, 33530, 33533-33536, 93539, 93540).                                                                                                                                                                                                                                                                                                                                                                                                                                                                                                                                                                                                                                                                                                                                                                                                                                                                                                              |
| <b>HIV</b>                         | Defined by HIV Registries at KPSC                                                                                                                                                                                                                                                                                                                                                                                                                                                                                                                                                                                                                                                                                                                                                                                                                                                                                                                                                                                                                                                                                                                                                                                                                                                                                                      |
| <b>Hepatitis B Infection (HBV)</b> | <p>Defined according to validated HBV Registry as meeting any one of the following criteria:</p> <ul style="list-style-type: none"> <li>a) Positive qualitative or quantitative HBV DNA</li> <li>b) Positive qualitative or quantitative Hepatitis B Virus Surface Antigen (HBs Ag)</li> <li>c) Positive qualitative or quantitative Hepatitis B Virus e Antigen (HBe Ag)</li> <li>d) Prescription of any of the following HBV Medications: <ul style="list-style-type: none"> <li>1. Adefovir (Hepsera® , Preveon, bis-POM PMPA, GS 840), Entecavir (Baraclude®, BMS-200475), or Telbivudine (Tyzeka®, Sebivo) for <math>\geq 90</math>-days within 1 year.</li> <li>2. Two outpatient diagnoses of chronic HBV and Interferon alfa-2b (intron A®) or Pegylated interferon (Pegasys® or peginterferon alfa-2a, PEG-intron® or peginterferon alfa-2b) for at least 90 days with no concurrent prescription for oral Ribavirin within a year.</li> <li>3. Lamivudine (Epivir®; 3TC) at 100 mg/day for <math>\geq 90</math>-days within 1 year without any other medications for HCV &amp; HIV</li> </ul> </li> <li>e) Two outpatient chronic HBV visits and Tenofovir (Viread®, bis-POC-PMPA) or Emtricitabine+tenofovir (emtriva®+viread® or Truvada®) for at least 90 days without any other HIV medications within a year</li> </ul> |
| <b>End-Stage Liver Disease</b>     | <p>At least one ICD-9-CM code for cirrhosis plus one ICD-9-CM code for a hepatic decompensation:</p> <ul style="list-style-type: none"> <li>1. Cirrhosis: 571.2 (alcoholic cirrhosis), 571.5 (cirrhosis without mention of alcohol, 571.6 (biliary cirrhosis)</li> <li>2. Hepatic decompensation: 456.0, 456.20 (esophageal varices with bleeding); 456.1, 456.21 (esophageal varices without bleeding); 789.5, 89.59 (ascites); 572.2 (hepatic coma)l 567.0, 567.2, 567.21, 567.21, 567.29, 567.8, 567.89, 567.9 (peritonitis); 572.4 (hepatorenal syndrome)</li> </ul>                                                                                                                                                                                                                                                                                                                                                                                                                                                                                                                                                                                                                                                                                                                                                               |

Supplemental material is neither peer-reviewed nor thoroughly edited by CJASN. The authors alone are responsible for the accuracy and presentation of the material.

Supplemental Table 2. Characteristics of Kaiser Permanente Southern California HCV&CKD Patients, by HCV Treatment Status

|                                                       | Excluded from the study cohort  |                                | Included in the study cohort |  |
|-------------------------------------------------------|---------------------------------|--------------------------------|------------------------------|--|
|                                                       | HCV treatment before index date | HCV treatment after index date | No HCV treatment             |  |
| <b>N</b>                                              | 218                             | 40                             | 1288                         |  |
| <b>Age</b>                                            |                                 |                                |                              |  |
| Mean (standard deviation)                             | 61.5 (9.11)                     | 61.9 (9.45)                    | 66.4 (10.73)                 |  |
| Median                                                | 61.5                            | 61.5                           | 66                           |  |
| Q1, Q3                                                | 56.0, 68.0                      | 55.0, 67.0                     | 58.0, 75.0                   |  |
| Range                                                 | (22.0-82.0)                     | (45.0-83.0)                    | (32.0-97.0)                  |  |
| <b>Sex</b>                                            |                                 |                                |                              |  |
| Female                                                | 80 (36.7%)                      | 18 (45%)                       | 574 (44.6%)                  |  |
| Male                                                  | 138 (63.3%)                     | 22 (55%)                       | 714 (55.4%)                  |  |
| <b>Race/ Ethnicity</b>                                |                                 |                                |                              |  |
| Asian/Native Hawaiian or Other Pacific Islander       | 9 (4.1%)                        | 3 (7.5%)                       | 68 (5.3%)                    |  |
| Black or African                                      | 50 (22.9%)                      | 12 (30%)                       | 354 (27.5%)                  |  |
| Hispanic                                              | 56 (25.7%)                      | 13 (32.5%)                     | 360 (28%)                    |  |
| White                                                 | 103 (47.2%)                     | 11 (27.5%)                     | 506 (39.3%)                  |  |
| Multiple/Others                                       |                                 | 1 (2.5%)                       |                              |  |
| <b>History of Type 1 and Type 2 Diabetes Mellitus</b> |                                 |                                |                              |  |
| No                                                    | 123 (56.4%)                     | 21 (52.5%)                     | 690 (53.6%)                  |  |
| Yes                                                   | 95 (43.6%)                      | 19 (47.5%)                     | 598 (46.4%)                  |  |
| <b>Hypertension</b>                                   |                                 |                                |                              |  |
| No                                                    | 64 (29.4%)                      | 8 (20%)                        | 357 (27.7%)                  |  |
| Yes                                                   | 154 (70.6%)                     | 32 (80%)                       | 931 (72.3%)                  |  |
| <b>HIV</b>                                            |                                 |                                |                              |  |
| No                                                    | 209 (95.9%)                     | 37 (92.5%)                     | 1254 (97.4%)                 |  |
| Yes                                                   | 9 (4.1%)                        | 3 (7.5%)                       | 34 (2.6%)                    |  |
| <b>Hepatitis B Virus</b>                              |                                 |                                |                              |  |
| No                                                    | 210 (96.3%)                     | 39 (97.5%)                     | 1272 (98.8%)                 |  |
| Yes                                                   | 8 (3.7%)                        | 1 (2.5%)                       | 16 (1.2%)                    |  |
| <b>Acute Myocardial Infarction</b>                    |                                 |                                |                              |  |
| No                                                    | 213 (97.7%)                     | 39 (97.5%)                     | 1257 (97.6%)                 |  |
| Yes                                                   | 5 (2.3%)                        | 1 (2.5%)                       | 31 (2.4%)                    |  |
| <b>Baseline closest FIB4</b>                          |                                 |                                |                              |  |
| N                                                     | 153                             | 27                             | 666                          |  |
| Mean (standard deviation)                             | 5.5 (6.50)                      | 3.7 (4.57)                     | 7.1 (26.27)                  |  |
| Median                                                | 3                               | 2.2                            | 3.5                          |  |
| Q1, Q3                                                | 1.7, 7.0                        | 1.2, 3.0                       | 1.9, 7.1                     |  |
| Range                                                 | (0.4-41.3)                      | (0.9-18.7)                     | (0.3-648.8)                  |  |
| <b>Baseline CKD stage</b>                             |                                 |                                |                              |  |
| Stage 3                                               | 204 (93.6%)                     | 29 (72.5%)                     | 1135 (88.1%)                 |  |
| Stage 4                                               | 10 (4.6%)                       | 7 (17.5%)                      | 105 (8.2%)                   |  |
| Stage 5                                               | 4 (1.8%)                        | 4 (10%)                        | 48 (3.7%)                    |  |

HCV=hepatitis C virus; CKD=chronic kidney disease;

Supplemental material is neither peer-reviewed nor thoroughly edited by CJASN. The authors alone are responsible for the accuracy and presentation of the material.

Supplemental Table 3. Adjusted Difference in the Change in eGFR over Time in Patients with Chronic Kidney Disease (CKD) and Hepatitis C Virus (HCV) Infection Compared to those with Chronic Kidney Disease Alone

| Parameter                                          | Estimate | Standard Error | 95% Confidence Limits |        | Pr >  Z |
|----------------------------------------------------|----------|----------------|-----------------------|--------|---------|
| <b>HCV&amp;CKD<sup>a</sup></b>                     | -4.37    | 0.28           | -4.91                 | -3.82  | <.0001  |
| <b>Time (year)</b>                                 | -1.04    | 0.01           | -1.06                 | -1.01  | <.0001  |
| <b>CKD Stage 4<sup>b</sup></b>                     | -16.24   | 0.17           | -16.57                | -15.91 | <.0001  |
| <b>CKD Stage 5<sup>b</sup></b>                     | -24.41   | 0.45           | -25.30                | -23.52 | <.0001  |
| <b>Diabetes Mellitus</b>                           | -0.98    | 0.05           | -1.07                 | -0.88  | <.0001  |
| <b>Hypertension</b>                                | -0.12    | 0.04           | -0.20                 | -0.03  | 0.0061  |
| <b>HIV</b>                                         | -0.01    | 0.37           | -0.72                 | 0.71   | 0.9842  |
| <b>Hepatitis B Virus</b>                           | 0.70     | 0.40           | -0.09                 | 1.49   | 0.0844  |
| <b>Myocardial Infarction</b>                       | -2.19    | 0.12           | -2.43                 | -1.95  | <.0001  |
| <b>End-stage Liver Disease</b>                     | -4.66    | 0.32           | -5.29                 | -4.04  | <.0001  |
| <b>Age (years)</b>                                 | 0.02     | 0.00           | 0.01                  | 0.02   | <.0001  |
| <b>Sex (Female)<sup>c</sup></b>                    | -0.11    | 0.04           | -0.19                 | -0.03  | 0.0058  |
| <b>Asian/Pacific Islander<sup>d</sup></b>          | 0.52     | 0.08           | 0.36                  | 0.68   | <.0001  |
| <b>Black<sup>d</sup></b>                           | -0.87    | 0.07           | -1.01                 | -0.73  | <.0001  |
| <b>Hispanic<sup>d</sup></b>                        | -0.60    | 0.06           | -0.72                 | -0.47  | <.0001  |
| <b>Other Race<sup>d</sup></b>                      | 0.56     | 0.51           | -0.44                 | 1.55   | 0.2738  |
| <b>Time (year)*HCV&amp;CKD<sup>e</sup></b>         | -0.58    | 0.13           | -0.84                 | -0.31  | <.0001  |
| <b>Time (year)*Diabetes mellitus</b>               | -0.89    | 0.02           | -0.94                 | -0.85  | <.0001  |
| <b>Time (year)*HBV</b>                             | -0.70    | 0.22           | -1.12                 | -0.27  | 0.0012  |
| <b>Time (year)*Asian/Pac. Islander<sup>d</sup></b> | -0.39    | 0.04           | -0.46                 | -0.32  | <.0001  |
| <b>Time (year)*Black<sup>d</sup></b>               | -0.55    | 0.03           | -0.62                 | -0.49  | <.0001  |
| <b>Time (year)* Hispanic<sup>d</sup></b>           | -0.45    | 0.03           | -0.51                 | -0.39  | <.0001  |
| <b>Time (year)*Other Race<sup>d</sup></b>          | -0.21    | 0.25           | -0.71                 | 0.29   | 0.4072  |
| <b>Time (year)*HCV&amp;CKD + Time (year)</b>       | -1.61    | 0.14           | -1.90                 | -1.33  | <.0001  |

<sup>a</sup> Reference value = CKD only; CKD = Chronic Kidney Disease, HCV = Hepatitis C infection

<sup>b</sup> Reference value = CKD Stage 3

<sup>c</sup> Reference value = Male

<sup>d</sup> Reference value = White race

<sup>e</sup> Reference value = Time\*CKD only

Supplemental material is neither peer-reviewed nor thoroughly edited by CJASN. The authors alone are responsible for the accuracy and presentation of the material.

Supplemental Table 4.

a) Stratified Adjusted Hazard Ratios for 25% decrease in eGFR in HCV Treatment Naïve Patients with HCV&CKD (N=1603) compared to CKD alone (N=151974)\*

| Subgroup                |          | Diabetes Mellitus |        |     |               |        |     | Hypertension  |        |     |              |        |     | CKD Stage          |        |     |                  |        |     |                 |        |      |
|-------------------------|----------|-------------------|--------|-----|---------------|--------|-----|---------------|--------|-----|--------------|--------|-----|--------------------|--------|-----|------------------|--------|-----|-----------------|--------|------|
|                         |          | Yes (N=48735)     |        |     | No (N=104842) |        |     | Yes (N=93885) |        |     | No (N=59692) |        |     | Stage 3 (N=148931) |        |     | Stage 4 (N=3777) |        |     | Stage 5 (N=869) |        |      |
|                         |          | HR                | 95% CI |     | HR            | 95% CI |     | HR            | 95% CI |     | HR           | 95% CI |     | HR                 | 95% CI |     | HR               | 95% CI |     | HR              | 95% CI |      |
| Cohort                  | HCV+CKD  | 1.8               | 1.6    | 1.9 | 2.0           | 1.8    | 2.2 | 1.8           | 1.7    | 2.0 | 2.2          | 1.9    | 2.5 | 1.7                | 1.6    | 1.8 | 2.4              | 1.9    | 3.0 | 2.9             | 1.9    | 4.6  |
|                         | CKD only | 1.0               | Ref    |     | 1.0           | Ref    |     | 1.0           | Ref    |     | 1.0          | Ref    |     | 1.0                | Ref    |     | 1.0              | Ref    |     | 1.0             | Ref    |      |
| Baseline eGFR           |          | 1.0               | 1.0    | 1.0 | 1.0           | 1.0    | 1.0 | 1.0           | 1.0    | 1.0 | 1.0          | 1.0    | 1.0 | NA                 |        |     |                  |        |     |                 |        |      |
| Diabetes mellitus       | Yes      | NA                |        |     |               |        |     | 1.6           | 1.6    | 1.7 | 1.9          | 1.8    | 1.9 | 1.7                | 1.7    | 1.7 | 1.3              | 1.2    | 1.4 | 1.2             | 0.8    | 1.6  |
|                         | No       | NA                |        |     |               |        |     | 1.0           | Ref    |     | 1.0          | Ref    |     | 1.0                | Ref    |     | 1.0              | Ref    |     | 1.0             | Ref    |      |
| Hypertension            | Yes      | 1.2               | 1.1    | 1.2 | 1.3           | 1.2    | 1.3 | NA            |        |     |              |        |     | 1.3                | 1.2    | 1.3 | 0.7              | 0.6    | 0.8 | 0.7             | 0.5    | 0.9  |
|                         | No       | 1.0               | Ref    |     | 1.0           | Ref    |     | NA            |        |     |              |        |     | 1.0                | Ref    |     | 1.0              | Ref    |     | 1.0             | Ref    |      |
| HIV                     | Yes      | 1.2               | 0.9    | 1.5 | 1.7           | 1.4    | 1.9 | 1.3           | 1.1    | 1.6 | 1.5          | 1.2    | 1.8 | 1.5                | 1.3    | 1.7 | 0.4              | 0.2    | 1.0 | NA              |        |      |
|                         | No       | 1.0               | Ref    |     | 1.0           | Ref    |     | 1.0           | Ref    |     | 1.0          | Ref    |     | 1.0                | Ref    |     | 1.0              | Ref    |     | NA              |        |      |
| Hepatitis B Virus       | Yes      | 0.9               | 0.7    | 1.2 | 1.3           | 1.1    | 1.6 | 1.2           | 1.0    | 1.4 | 1.1          | 0.9    | 1.4 | 1.1                | 1.0    | 1.3 | 2.2              | 0.9    | 5.0 | 1.1             | 0.3    | 4.8  |
|                         | No       | 1.0               | Ref    |     | 1.0           | Ref    |     | 1.0           | Ref    |     | 1.0          | Ref    |     | 1.0                | Ref    |     | 1.0              | Ref    |     | 1.0             | Ref    |      |
| Myocardial Infarction   | Yes      | 1.5               | 1.4    | 1.6 | 1.5           | 1.4    | 1.6 | 1.5           | 1.4    | 1.5 | 1.6          | 1.4    | 1.8 | 1.5                | 1.4    | 1.5 | 0.9              | 0.7    | 1.2 | 0.8             | 0.3    | 1.7  |
|                         | No       | 1.0               | Ref    |     | 1.0           | Ref    |     | 1.0           | Ref    |     | 1.0          | Ref    |     | 1.0                | Ref    |     | 1.0              | Ref    |     | 1.0             | Ref    |      |
| End-Stage Liver Disease | Yes      | 3.1               | 2.7    | 3.5 | 5.1           | 4.4    | 5.9 | 3.4           | 3.0    | 3.8 | 4.8          | 4.1    | 5.7 | 3.8                | 3.4    | 4.2 | 1.7              | 1.0    | 3.1 | NA              |        |      |
|                         | No       | 1.0               | Ref    |     | 1.0           | Ref    |     | 1.0           | Ref    |     | 1.0          | Ref    |     | 1.0                | Ref    |     | 1.0              | Ref    |     | NA              |        |      |
| Age                     |          | 1.0               | 1.0    | 1.0 | 1.0           | 1.0    | 1.0 | 1.0           | 1.0    | 1.0 | 1.0          | 1.0    | 1.0 | 1.0                | 1.0    | 1.0 | 1.0              | 1.0    | 1.0 | 1.0             | 1.0    | 1.0  |
| Sex                     | Female   | 1.0               | 1.0    | 1.1 | 1.0           | 1.0    | 1.0 | 1.1           | 1.0    | 1.1 | 1.0          | 0.9    | 1.0 | 1.0                | 1.0    | 1.0 | 0.8              | 0.7    | 0.9 | 0.9             | 0.7    | 1.2  |
|                         | Male     | 1.0               | Ref    |     | 1.0           | Ref    |     | 1.0           | Ref    |     | 1.0          | Ref    |     | 1.0                | Ref    |     | 1.0              | Ref    |     | 1.0             | Ref    |      |
| Race/Ethnicity          | Asian/PI | 0.9               | 0.9    | 1.0 | 1.1           | 1.0    | 1.1 | 1.0           | 0.9    | 1.0 | 1.1          | 1.1    | 1.2 | 1.0                | 1.0    | 1.0 | 1.1              | 0.9    | 1.4 | 1.5             | 0.8    | 2.6  |
|                         | Black    | 1.1               | 1.1    | 1.2 | 1.4           | 1.4    | 1.4 | 1.2           | 1.1    | 1.2 | 1.5          | 1.5    | 1.6 | 1.3                | 1.2    | 1.3 | 1.4              | 1.2    | 1.6 | 2.3             | 1.6    | 3.3  |
|                         | Hispanic | 1.2               | 1.2    | 1.2 | 1.2           | 1.2    | 1.2 | 1.2           | 1.1    | 1.2 | 1.3          | 1.3    | 1.4 | 1.2                | 1.2    | 1.2 | 1.4              | 1.3    | 1.6 | 2.0             | 1.4    | 2.9  |
|                         | Others   | 0.8               | 0.7    | 1.1 | 0.8           | 0.7    | 1.0 | 0.8           | 0.6    | 0.9 | 1.0          | 0.8    | 1.3 | 0.8                | 0.7    | 1.0 | 1.5              | 0.7    | 3.0 | 2.7             | 0.4    | 19.8 |
|                         | White    | 1.0               | Ref    |     | 1.0           | Ref    |     | 1.0           | Ref    |     | 1.0          | Ref    |     | 1.0                | Ref    |     | 1.0              | Ref    |     | 1.0             | Ref    |      |

\*Sex, age, and race not shown; none are statistically different; HCV=hepatitis C virus infection, CKD=chronic kidney disease, CI=confidence interval, HR=hazard ratio, PI=pacific islander

Supplemental material is neither peer-reviewed nor thoroughly edited by CJASN. The authors alone are responsible for the accuracy and presentation of the material.

b.) Stratified Adjusted Cause-Specific Hazard Ratio for ESRD in HCV Treatment Naïve Patients with HCV+CKD (N=1534) compared to CKD alone (N=151174)\*

| Subgroup                |          | Diabetes Mellitus |        |     |               |        |     | Hypertension  |        |     |              |        |     | CKD Stage          |        |     |                  |        |     |
|-------------------------|----------|-------------------|--------|-----|---------------|--------|-----|---------------|--------|-----|--------------|--------|-----|--------------------|--------|-----|------------------|--------|-----|
|                         |          | Yes (N=48507)     |        |     | No (N=104201) |        |     | Yes (N=93493) |        |     | No (N=59215) |        |     | Stage 3 (N=148931) |        |     | Stage 4 (N=3777) |        |     |
|                         |          | HR                | 95% CI |     | HR            | 95% CI |     | HR            | 95% CI |     | HR           | 95% CI |     | HR                 | 95% CI |     | HR               | 95% CI |     |
| Cohort                  | HCV+CKD  | 1.4               | 1.1    | 1.8 | 2.6           | 2.1    | 3.3 | 1.3           | 1.0    | 1.7 | 3.2          | 2.6    | 4.0 | 2.5                | 2.1    | 3.0 | 1.1              | 0.7    | 1.6 |
|                         | CKD only | 1.0               | Ref    |     | 1.0           | Ref    |     | 1.0           | Ref    |     | 1.0          | Ref    |     | 1.0                | Ref    |     | 1.0              | Ref    |     |
| Baseline eGFR           |          | 1.0               | 1.0    | 1.0 | 0.9           | 0.9    | 0.9 | 1.0           | 0.9    | 1.0 | 0.9          | 0.9    | 0.9 | NA                 |        |     |                  |        |     |
| Diabetes mellitus       | Yes      | NA                |        |     |               |        |     | 3.6           | 3.3    | 3.9 | 2.2          | 2.0    | 2.4 | 3.0                | 2.8    | 3.2 | 1.6              | 1.3    | 1.9 |
|                         | No       | NA                |        |     |               |        |     | 1.0           | Ref    |     | 1.0          | Ref    |     | 1.0                | Ref    |     | 1.0              | Ref    |     |
| Hypertension            | Yes      | 1.0               | 0.9    | 1.0 | 0.5           | 0.5    | 0.6 | NA            |        |     |              |        |     | 0.8                | 0.7    | 0.8 | 0.6              | 0.5    | 0.7 |
|                         | No       | 1.0               | Ref    |     | 1.0           | Ref    |     | NA            |        |     |              |        |     | 1.0                | Ref    |     | 1.0              | Ref    |     |
| HIV                     | Yes      | 1.3               | 0.8    | 2.2 | 1.1           | 0.7    | 1.6 | 1.4           | 0.9    | 2.3 | 0.9          | 0.6    | 1.4 | 1.4                | 1.0    | 1.9 | 0.7              | 0.2    | 2.1 |
|                         | No       | 1.0               | Ref    |     | 1.0           | Ref    |     | 1.0           | Ref    |     | 1.0          | Ref    |     | 1.0                | Ref    |     | 1.0              | Ref    |     |
| Hepatitis B Virus       | Yes      | 1.2               | 0.7    | 2.1 | 1.4           | 0.8    | 2.5 | 1.2           | 0.7    | 2.2 | 1.1          | 0.6    | 1.9 | 1.1                | 0.7    | 1.7 | 1.7              | 0.5    | 5.6 |
|                         | No       | 1.0               | Ref    |     | 1.0           | Ref    |     | 1.0           | Ref    |     | 1.0          | Ref    |     | 1.0                | Ref    |     | 1.0              | Ref    |     |
| Myocardial Infarction   | Yes      | 1.2               | 1.0    | 1.5 | 1.4           | 1.0    | 1.9 | 1.2           | 1.0    | 1.4 | 1.5          | 1.1    | 2.0 | 1.4                | 1.2    | 1.7 | 1.0              | 0.7    | 1.6 |
|                         | No       | 1.0               | Ref    |     | 1.0           | Ref    |     | 1.0           | Ref    |     | 1.0          | Ref    |     | 1.0                | Ref    |     | 1.0              | Ref    |     |
| End-Stage Liver Disease | Yes      | 1.9               | 1.3    | 2.9 | 4.7           | 3.2    | 7.0 | 2.5           | 1.7    | 3.7 | 3.2          | 2.2    | 4.8 | 3.9                | 2.9    | 5.2 | 2.2              | 1.0    | 4.7 |
|                         | No       | 1.0               | Ref    |     | 1.0           | Ref    |     | 1.0           | Ref    |     | 1.0          | Ref    |     | 1.0                | Ref    |     | 1.0              | Ref    |     |
| Age                     |          | 0.9               | 0.9    | 0.9 | 0.9           | 0.9    | 0.9 | 0.9           | 0.9    | 0.9 | 0.9          | 0.9    | 0.9 | 0.9                | 0.9    | 0.9 | 1.0              | 1.0    | 1.0 |
| Sex                     | Female   | 0.7               | 0.6    | 0.7 | 0.6           | 0.6    | 0.7 | 0.6           | 0.6    | 0.7 | 0.7          | 0.6    | 0.7 | 0.7                | 0.7    | 0.7 | 0.6              | 0.5    | 0.7 |
|                         | Male     | 1.0               | Ref    |     | 1.0           | Ref    |     | 1.0           | Ref    |     | 1.0          | Ref    |     | 1.0                | Ref    |     | 1.0              | Ref    |     |
| Race/Ethnicity          | Asian/PI | 1.6               | 1.4    | 1.8 | 1.6           | 1.3    | 1.8 | 1.5           | 1.3    | 1.7 | 1.8          | 1.6    | 2.1 | 1.6                | 1.5    | 1.8 | 1.8              | 1.3    | 2.4 |
|                         | Black    | 2.0               | 1.8    | 2.2 | 3.9           | 3.5    | 4.3 | 1.7           | 1.5    | 1.9 | 4.6          | 4.1    | 5.0 | 2.9                | 2.7    | 3.1 | 2.4              | 1.9    | 2.9 |
|                         | Hispanic | 2.3               | 2.1    | 2.6 | 2.0           | 1.8    | 2.3 | 2.1           | 1.9    | 2.3 | 2.5          | 2.2    | 2.7 | 2.4                | 2.2    | 2.6 | 2.0              | 1.6    | 2.4 |
|                         | Others   | 2.0               | 1.2    | 3.4 | 3.1           | 1.8    | 5.2 | 1.1           | 0.5    | 2.2 | 4.3          | 2.8    | 6.7 | 2.4                | 1.6    | 3.6 | 2.1              | 0.9    | 5.1 |
|                         | White    | 1.0               | Ref    |     | 1.0           | Ref    |     | 1.0           | Ref    |     | 1.0          | Ref    |     | 1.0                | Ref    |     | 1.0              | Ref    |     |

\*Sex, age, and race not shown; none are statistically different; HCV=hepatitis C virus infection, CKD=chronic kidney disease, CI=confidence interval, HR=hazard ratio, PI=pacific islander

Supplemental material is neither peer-reviewed nor thoroughly edited by CJASN. The authors alone are responsible for the accuracy and presentation of the material.

**Adjusted Cause-Specific Hazard Ratio for Persistent eGFR <15 and Dialysis in Patients with Treatment Naïve HCV and Chronic Kidney Disease (N=1603) Compared to those with Chronic Kidney Disease Alone (N=151974)**

|                             |                        | eGFR <15 (n=2724) |             | Dialysis (n=2678) |             |
|-----------------------------|------------------------|-------------------|-------------|-------------------|-------------|
|                             |                        | HR*†              | 95% CI      | HR*†              | 95% CI      |
| <b>Cohort</b>               | HCV&CKD*               | 1.94              | 1.53 – 2.45 | 2.18              | 1.75 - 2.71 |
|                             | CKD only               | 1.00              | Ref         | 1.00              | Ref         |
| <b>Age (years)</b>          |                        | 0.93              | 0.92 – 0.93 | 0.94              | 0.94 - 0.95 |
| <b>Sex</b>                  | Female                 | 0.71              | 0.66 – 0.76 | 0.59              | 0.55 - 0.64 |
|                             | Male                   | 1.00              | Ref         | 1.00              | Ref         |
| <b>Race</b>                 | Asian/Pacific Islander | 2.40              | 2.09 – 2.75 | 1.09              | 0.94 - 1.27 |
|                             | Black                  | 3.61              | 3.25 – 4.01 | 2.20              | 1.99 - 2.42 |
|                             | Hispanic               | 2.97              | 2.67 – 3.29 | 1.84              | 1.67 - 2.03 |
|                             | Others                 | 3.85              | 2.41 – 6.16 | 1.43              | 0.77 – 2.67 |
|                             | White                  | 1.00              | Ref         | 1.00              | Ref         |
| <b>Baseline Comorbidity</b> | Diabetes mellitus      | 2.62              | 2.42 – 2.83 | 3.06              | 2.82 – 3.32 |
|                             | Hypertension           | 0.65              | 0.60 – 0.71 | 0.85              | 0.78 - 0.92 |
|                             | HIV                    | 1.26              | 0.81 – 1.96 | 1.21              | 0.76 - 1.92 |
|                             | Hepatitis B            | 1.26              | 0.71 – 2.21 | 1.25              | 0.70 – 2.25 |
|                             | Myocardial Infarction  | 0.98              | 0.74 – 1.28 | 1.62              | 1.33 - 1.97 |
| <b>Baseline eGFR*</b>       |                        | 0.93              | 0.93 – 0.94 | 0.95              | 0.95 - 0.95 |

\*HR=Hazard Ratio; CKD=Chronic Kidney Disease; HCV=Hepatitis C Virus; eGFR=Estimated Glomerular Filtration Rate

†Follow-up time is censored at the time of the start of dialysis, liver/kidney transplant, HCV treatment, death, disenrollment from KP health plan, or the end of the study period (12/31/2014); ESKD analyses censored on liver transplant, HCV treatment, death, disenrollment from KP health plan, or the end of the study period



Supplemental material is neither peer-reviewed nor thoroughly edited by CJASN. The authors alone are responsible for the accuracy and presentation of the material.

## Supplemental Table 5. Sensitivity Analyses

### Sensitivity Analyses using Propensity Score Matching

#### a.) Covariate distribution following propensity score match for analyses of 25% decline in eGFR

|                                                       |                                                 | HCV&CKD*<br>N=1603 | CKD only<br>N= 1603 |
|-------------------------------------------------------|-------------------------------------------------|--------------------|---------------------|
| <b>Sex</b>                                            |                                                 |                    |                     |
|                                                       | Female                                          | 691 (43%)          | 721 (45%)           |
|                                                       | Male                                            | 912 (57%)          | 882 (55%)           |
| <b>Age at CKD Index Date</b>                          | Mean (SD)                                       | 65.4 (10.63)       | 65.1 (13.78)        |
| <b>Race/Ethnicity</b>                                 |                                                 |                    |                     |
|                                                       | Asian/Native Hawaiian or Other Pacific Islander | 78 (5%)            | 81 (5%)             |
|                                                       | Black or African                                | 576 (36%)          | 596 (37%)           |
|                                                       | Hispanic                                        | 379 (24%)          | 383 (24%)           |
|                                                       | Multiple/Others                                 | 5 (0.3%)           | 5 (0.3%)            |
|                                                       | White                                           | 565 (35%)          | 538 (37%)           |
| <b>History of Type 1 and Type 2 Diabetes Mellitus</b> |                                                 | 675 (42%)          | 668 (42%)           |
| <b>Hypertension</b>                                   |                                                 | 1128 (70%)         | 1142 (71%)          |
| <b>HIV</b>                                            |                                                 | 60 (4%)            | 62 (4%)             |
| <b>Hepatitis B</b>                                    |                                                 | 24 (2%)            | 22 (1%)             |
| <b>End Stage Liver Disease</b>                        |                                                 | 141 (9%)           | 117 (7%)            |
| <b>Acute Myocardial Infarction</b>                    |                                                 | 38 (2%)            | 33 (2%)             |
| <b>eGFR value at baseline</b>                         | Mean (SD)                                       | 44 (12.86)         | 44 (12.99)          |

\*HCV=hepatitis C virus, CKD=chronic kidney disease, SD=standard deviation

#### b.) Covariate distribution following propensity score match for analyses of ESKD

|                                                       |                                                 | HCV&CKD<br>N=1534 | CKD only<br>N= 1534 |
|-------------------------------------------------------|-------------------------------------------------|-------------------|---------------------|
| <b>Sex</b>                                            |                                                 |                   |                     |
|                                                       | Female                                          | 660 (43%)         | 640 (42%)           |
|                                                       | Male                                            | 874 (57%)         | 894 (58%)           |
| <b>Age at CKD Index Date</b>                          | Mean (SD)                                       | 65.6 (10.56)      | 66.0 (12.98)        |
| <b>Race/Ethnicity</b>                                 |                                                 |                   |                     |
|                                                       | Asian/Native Hawaiian or Other Pacific Islander | 75 (5%)           | 78 (5%)             |
|                                                       | Black or African                                | 543 (35%)         | 579 (38%)           |
|                                                       | Hispanic                                        | 361 (24%)         | 355 (23%)           |
|                                                       | Multiple/Others                                 | 5 (0.3%)          | 3 (0.2%)            |
|                                                       | White                                           | 550 (36%)         | 519 (34%)           |
| <b>History of Type 1 and Type 2 Diabetes Mellitus</b> |                                                 | 646 (42%)         | 643 (42%)           |
| <b>Hypertension</b>                                   |                                                 | 1073 (70%)        | 1100 (72%)          |
| <b>HIV</b>                                            |                                                 | 59 (4%)           | 56 (4%)             |
| <b>Hepatitis B</b>                                    |                                                 | 23 (2%)           | 20 (1%)             |
| <b>End Stage Liver Disease</b>                        |                                                 | 140 (9%)          | 118 (8%)            |
| <b>Acute Myocardial Infarction</b>                    |                                                 | 35 (2%)           | 39 (3%)             |
| <b>eGFR value at baseline</b>                         | Mean (SD)                                       | 45 (10.78)        | 45 (10.54)          |

\*HCV=hepatitis C virus, CKD=chronic kidney disease, SD=standard deviation

Supplemental material is neither peer-reviewed nor thoroughly edited by CJASN. The authors alone are responsible for the accuracy and presentation of the material.

**c.) Propensity-Score Matched Adjusted Cause-Specific Hazard Ratio for 25% Decrease in eGFR and End Stage Kidney Disease in Patients with Chronic Kidney Disease (CKD) and Hepatitis C Infection (HCV) Compared to Those with Chronic Kidney Disease Alone**

|        |          | 25% Decline in eGFR |             | End-Stage Kidney Disease |             |
|--------|----------|---------------------|-------------|--------------------------|-------------|
|        |          | Hazard Ratio*       | 95% CI      | Hazard Ratio*            | 95% CI      |
| Cohort | HCV&CKD  | 1.82                | 1.65 – 2.01 | 1.55                     | 1.24 – 1.95 |
|        | CKD only | 1.00                | Ref         | 1.00                     | Ref         |

\*Adjusted for sex, age, race, diabetes, hypertension, HIV, hepatitis B, end stage liver disease, acute myocardial infarction, and eGFR at baseline.

**Sensitivity Analyses Including only HCV RNA Positive Cases (HCV positive n=1372)**

**Adjusted Cause-Specific Hazard Ratio for 25% Decrease in eGFR and End Stage Kidney Disease in Patients with Chronic Kidney Disease and RNA Positive Hepatitis C Infection Compared to Those with Chronic Kidney Disease Alone**

|                      |                        | 25% Decline in eGFR |             | End-Stage Kidney Disease |             |
|----------------------|------------------------|---------------------|-------------|--------------------------|-------------|
|                      |                        | HR* <sup>†</sup>    | 95% CI      | HR* <sup>‡</sup>         | 95% CI      |
| Cohort               | HCV&CKD*               | 1.84                | 1.71 – 1.98 | 1.93                     | 1.62 - 2.29 |
|                      | CKD only               | 1.00                | Ref         | 1.00                     | Ref         |
| Age (years)          |                        | 1.00                | 1.00 – 1.00 | 0.93                     | 0.93 - 0.94 |
| Sex                  | Female                 | 1.01                | 0.99 – 1.03 | 0.65                     | 0.61 - 0.68 |
|                      | Male                   | 1.00                | Ref         | 1.00                     | Ref         |
| Race                 | Asian/Pacific Islander | 1.01                | 0.98 – 1.04 | 1.65                     | 1.49 - 1.82 |
|                      | Black                  | 1.28                | 1.25 – 1.31 | 2.80                     | 2.61 - 3.00 |
|                      | Hispanic               | 1.21                | 1.19 – 1.24 | 2.31                     | 2.15 - 2.48 |
|                      | Others                 | 0.84                | 0.72 – 0.98 | 2.37                     | 1.62 - 3.46 |
|                      | White                  | 1.00                | Ref         | 1.00                     | Ref         |
| Baseline Comorbidity | Diabetes mellitus      | 1.71                | 1.68 – 1.74 | 2.81                     | 2.65 - 2.97 |
|                      | Hypertension           | 1.24                | 1.22 – 1.26 | 0.75                     | 0.72 - 0.79 |
|                      | HIV                    | 1.44                | 1.27 – 1.64 | 1.26                     | 0.91 - 1.73 |
|                      | Hepatitis B            | 1.18                | 1.03 – 1.36 | 1.17                     | 0.78 - 1.76 |
|                      | Myocardial Infarction  | 1.48                | 1.42 – 1.55 | 1.33                     | 1.14 - 1.56 |
|                      | ESLD                   | 3.82                | 3.47 – 4.20 | 2.91                     | 2.12 – 3.84 |
| Baseline eGFR*       |                        | 1.02                | 1.02 – 1.02 | 0.94                     | 0.94 - 0.94 |

\*HR=Hazard Ratio; CKD=Chronic Kidney Disease; HCV=Hepatitis C Virus; eGFR=Estimated Glomerular Filtration Rate

<sup>‡</sup>Patients with baseline eGFR < 15 were excluded: CKD only N=151974, HCV&CKD N=1372

<sup>†</sup>Follow-up time is censored at the time of the start of dialysis, liver/kidney transplant, HCV treatment, death, disenrollment from KP health plan, or the end of the study period (12/31/2014); ESKD analyses censored on liver transplant, HCV treatment, death, disenrollment from KP health plan, or the end of the study period

Supplemental material is neither peer-reviewed nor thoroughly edited by CJASN. The authors alone are responsible for the accuracy and presentation of the material.

### Supplemental Figure 1. Schematic Demonstrating Start of Person-Time, by Timing of Diagnosis

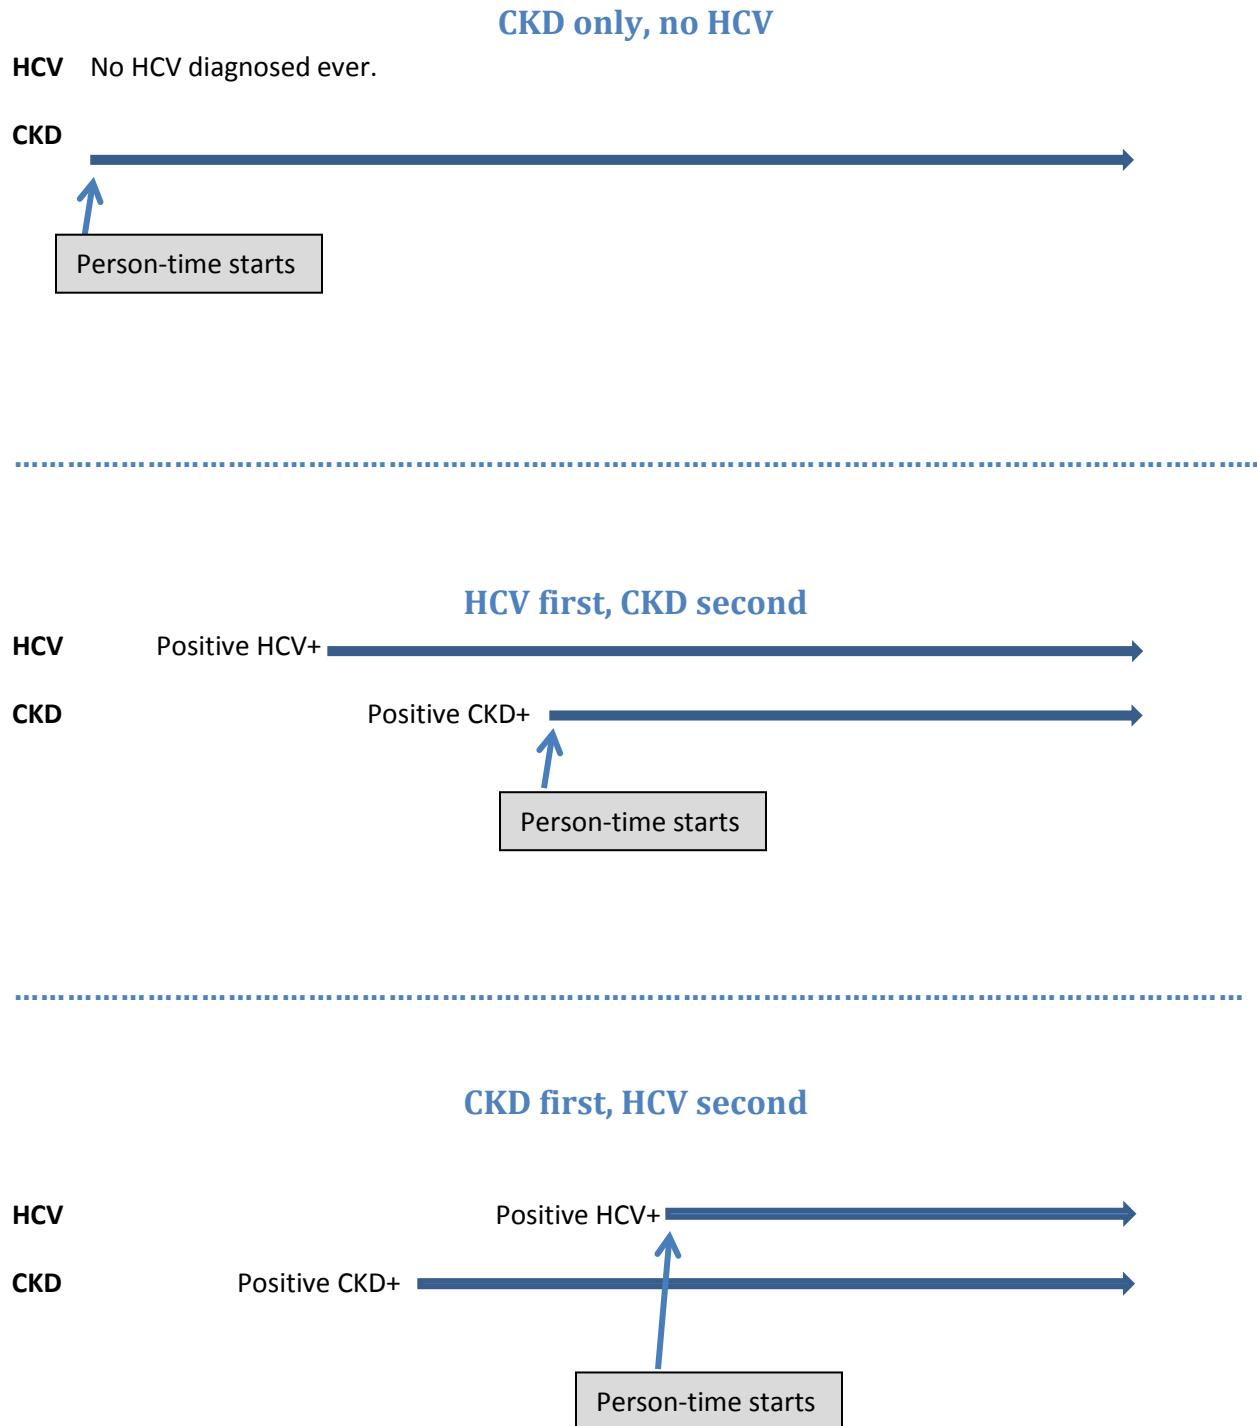

Supplement: CJN.01530218SupplementaryData.pdf [file CJN.01530218SupplementaryData.pdf]
